# Supplementary material
Source: PubMed Central journal article supplement (PMC6204741)

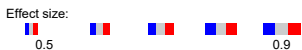

WT 24h vs Mock 24h  
 icmD 24h vs Mock 24h  
 icmD 24h vs WT 24h  
 WT 48h vs Mock 48h  
 icmD 48h vs Mock 48h  
 icmD 48h vs WT 48h

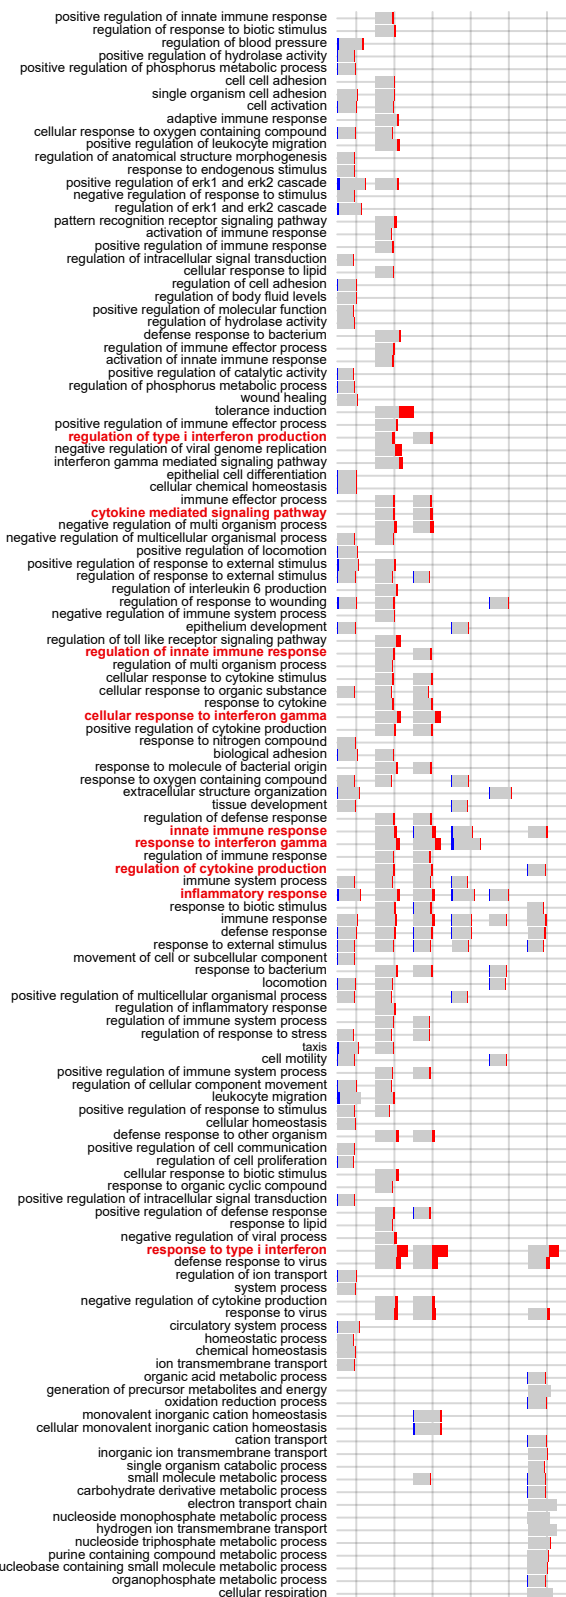

Supplement: zii999092559s2.pdf [file zii999092559s2.pdf]

icmD vs WT  
icmD vs Mock  
WT vs Mock

icmD vs WT  
icmD vs Mock  
WT vs Mock

24h 48h

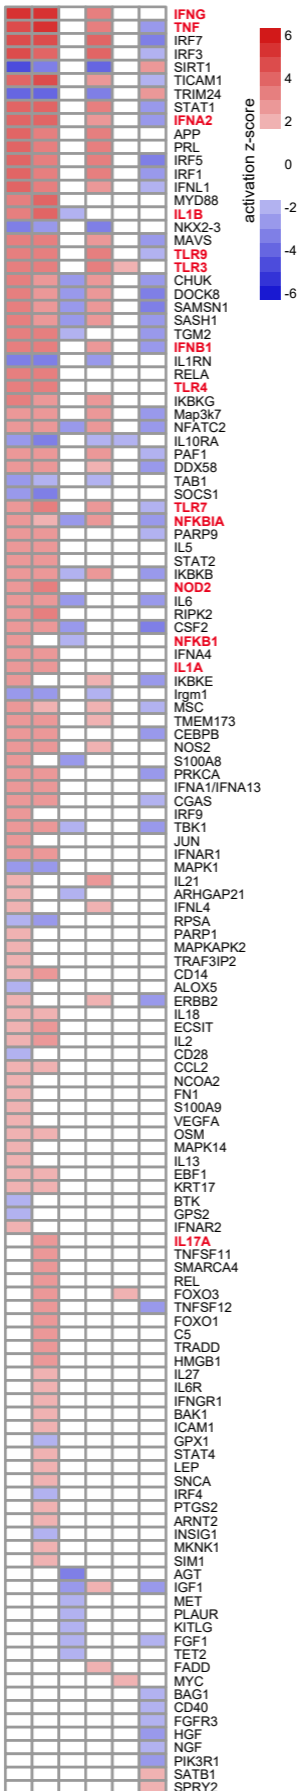

Supplement: zii999092559s3.pdf [file zii999092559s3.pdf]

# Supplementary figure 3

## A

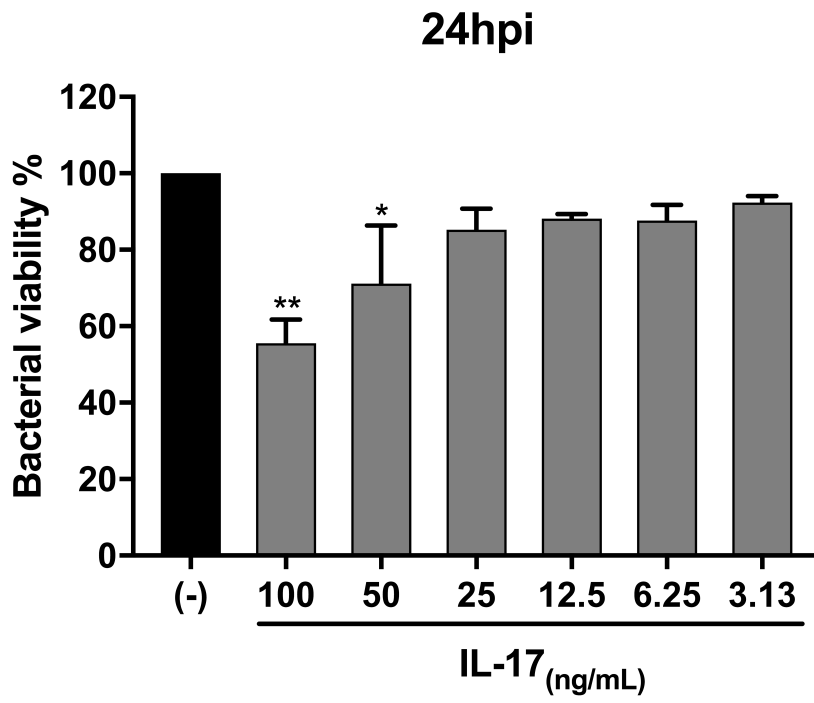

## B

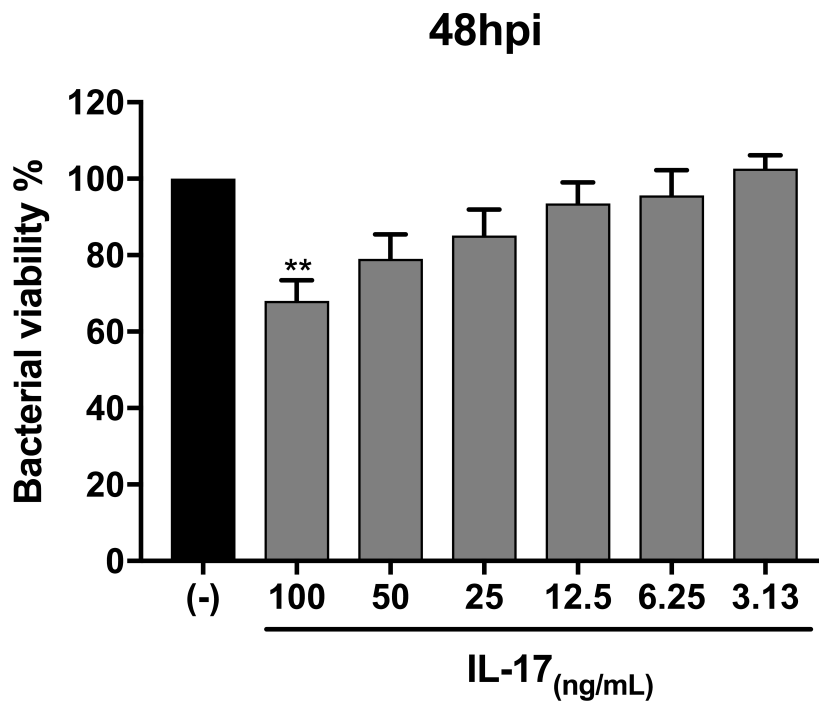

Supplement: zii999092559s4.pdf [file zii999092559s4.pdf]

**Figure S4**

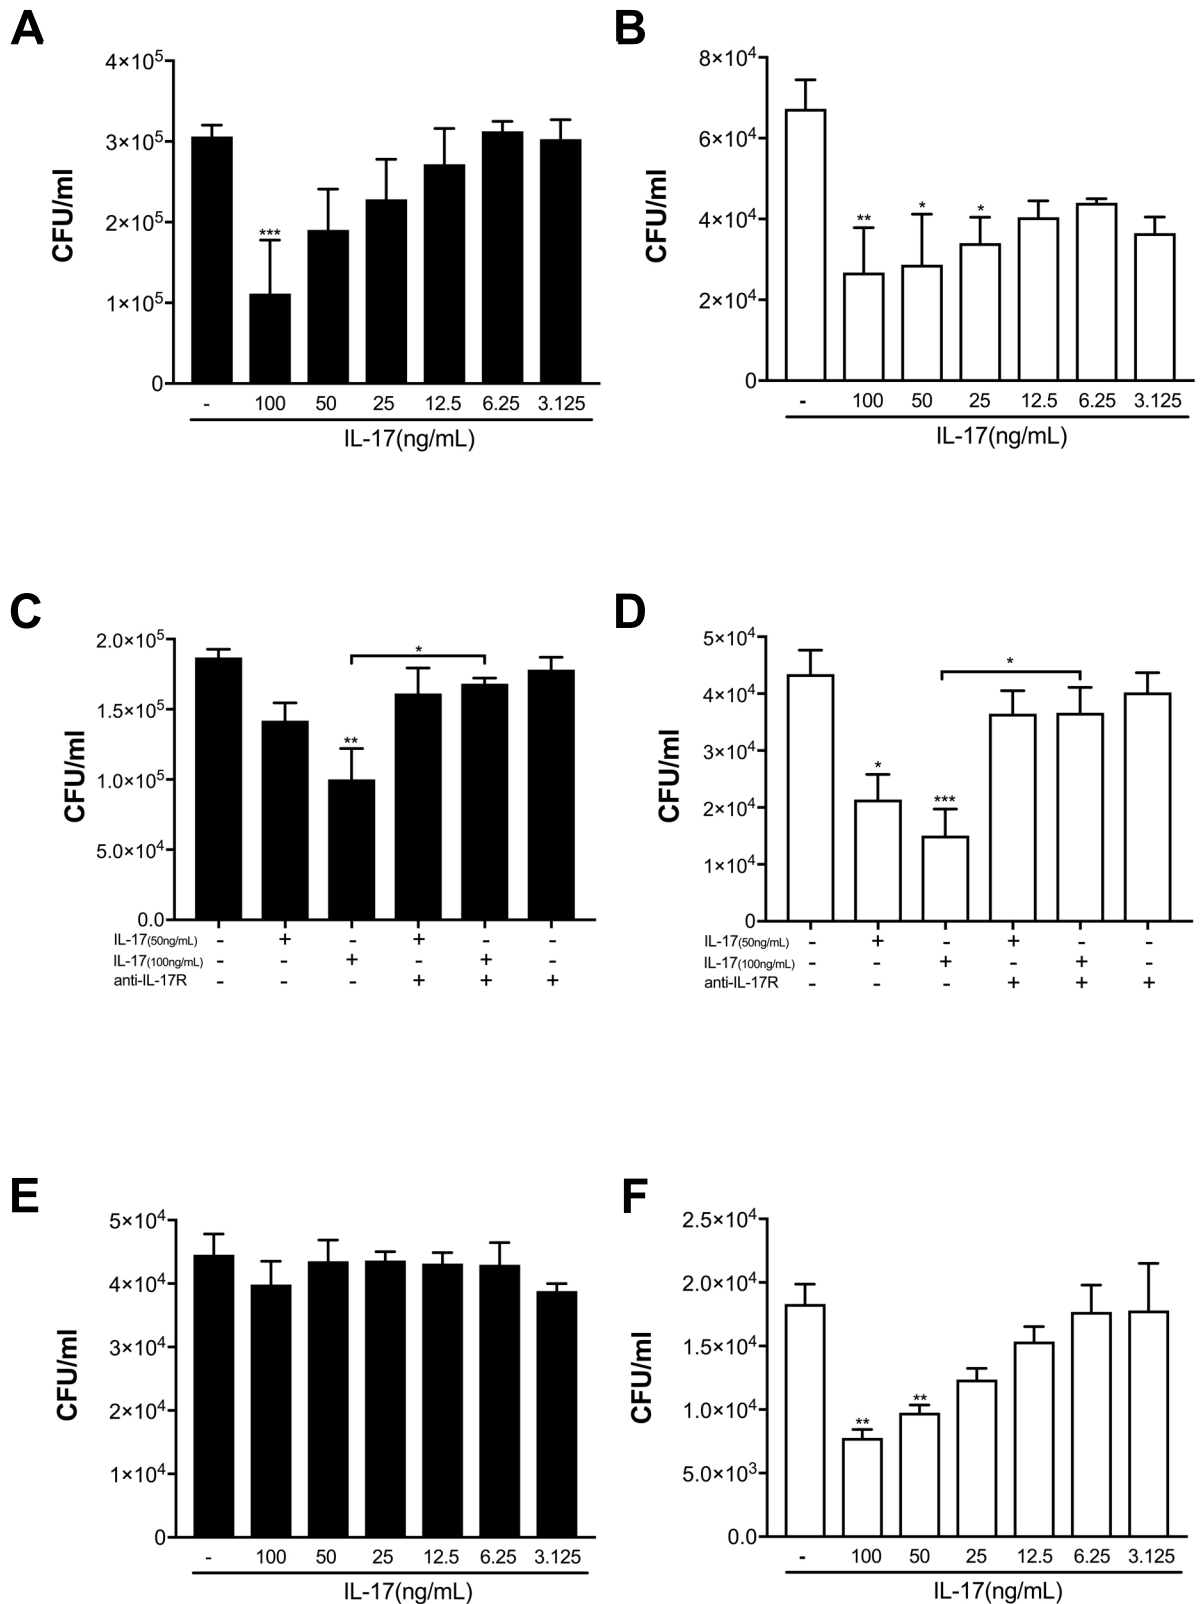

Supplement: zii999092559s5.pdf [file zii999092559s5.pdf]
